# Supplementary material for: A New Technique for Determining Micronutrient Nutritional Quality in Fruits and Vegetables Based on the Entropy Weight Method and Fuzzy Recognition Method
Source: MDPI journal article supplement (doi:10.3390/foods11233844), 2022-11-28
Supplement: s1 [file s1]

**Table S1.** The proportion of the population whose daily vitamin intake was lower than the RNI between 2010 to 2013 (%). The intake of vitamin E uses AI. The data source population represents the reference intake of dietary nutrients for people aged 18-50.

|                                              | Vitamin A  | Vitamin B1 | Vitamin B2 | Niacin        | Vitamin C  | Vitamin E                 |
|----------------------------------------------|------------|------------|------------|---------------|------------|---------------------------|
| Average                                      | 95.2       | 87.3       | 96.4       | 26.3          | 76.6       | /                         |
| City                                         | 94.5       | 90.6       | 93.3       | 22.5          | 75.4       | /                         |
| Rural                                        | 95.9       | 84.1       | 95.8       | 28.1          | 77.8       | /                         |
| Average intake of school-aged children       | 86.0       | 87.0       | 93.2       | /             | 83.6       | /                         |
| Average intake of urban school-aged children | 80.4       | 88.4       | 88.8       | /             | 83.8       | /                         |
| Average intake of rural school-aged children | 89.8       | 86.1       | 96.2       | /             | 86.8       | /                         |
| Average intake of the elderly                | 88.8       | 93.08      | 96.5       | /             | 80.3       | 23.9                      |
| Average intake of urban elderly              | 85.5       | 93.8       | 94.9       | /             | 77.1       | 20.3                      |
| Average intake of rural elderly              | 92.9       | 92.3       | 98.5       | /             | 84.1       | 28.3                      |
| The main source of food                      | Vegetables | Noodles    | Vegetables | Rice and Meat | Vegetables | Edible Oil and Vegetables |

**Table S2.** The proportion of the population whose average daily mineral intake is lower than the RNI from 2010 to 2013 (%). The selenium intake is expressed in  $\mu\text{g}$ , while the recommended potassium intake value is expressed as AI.

|                                             | Calcium    | Magnesium                    | Potassium  | Phosphorus       | Iron                         | Zinc | Selenium   |
|---------------------------------------------|------------|------------------------------|------------|------------------|------------------------------|------|------------|
| Average                                     | 98.5       | 76.5                         | 83.4       | 29.6             | 31.1                         | 53.4 | 82.2       |
| City                                        | 97.9       | 79.9                         | /          | 31.4             | 31.4                         | 56.5 | 80.4       |
| Rural                                       | 99.0       | 73.1                         | /          | 27.9             | 30.9                         | 50.4 | 83.9       |
| Average intake of school-age children       | 99.6       | /                            | /          | /                | 43.2                         | 53.1 | /          |
| Average intake of urban school-age children | 99.2       | /                            | /          | /                | 43.0                         | 49.7 | /          |
| Average intake of rural school-age children | 99.9       | /                            | /          | /                | 46.8                         | 53.8 | /          |
| Average intake of the elderly               | 98.8       | /                            | 86.3       | /                | 21.6                         | 66.9 | /          |
| Average intake of urban elderly             | 98.2       | /                            | 83.4       | /                | 20.3                         | 66.8 | /          |
| Average intake of rural elderly             | 99.6       | /                            | 89.9       | /                | 23.3                         | 67.1 | /          |
| The main source of food                     | Vegetables | Noodles, Rice and Vegetables | Vegetables | Noodles and Rice | Noodles, Rice and Vegetables | Rice | Vegetables |

**Table S3.** The vitamin and mineral content of 20 fruits

| Fruits        | Vitamins(mg/100g) |            |           |                       |               |                 | Minerals (mg/100g) |           |           |      |      |        |           |               |
|---------------|-------------------|------------|-----------|-----------------------|---------------|-----------------|--------------------|-----------|-----------|------|------|--------|-----------|---------------|
|               | Vitamin (μgRA E)  | Vitamin B3 | Vitamin C | Vitamin E (mg/α-TE/d) | Thiamine (B1) | Riboflavin (B2) | Calcium            | Potassium | Magnesium | Iron | Zinc | Copper | Manganese | Selenium (μg) |
| Apples        | 4                 | 0.2        | 3         | 0.43                  | 0.02          | 0.02            | 4                  | 83        | 4         | 0.3  | 0.04 | 0.07   | 0.03      | 0.1           |
| Pears         | 2                 | 0.2        | 5         | 0.46                  | 0.03          | 0.03            | 7                  | 85        | 8         | 0.4  | 0.1  | 0.1    | 0.06      | 0.29          |
| Peaches       | 2                 | 0.3        | 10        | 0.71                  | 0.01          | 0.02            | 6                  | 127       | 8         | 0.3  | 0.14 | 0.06   | 0.07      | 0.47          |
| Chinese Dates | 20                | 0.9        | 243       | 0.78                  | 0.06          | 0.09            | 22                 | 375       | 25        | 1.2  | 1.52 | 0.06   | 0.32      | 0.8           |
| Apricots      | 38                | 0.6        | 4         | 0.95                  | 0.02          | 0.03            | 14                 | 226       | 11        | 0.6  | 0.2  | 0.11   | 0.06      | 0.2           |

|               |    |      |     |      |      |      |     |     |    |     |      |      |      |      |
|---------------|----|------|-----|------|------|------|-----|-----|----|-----|------|------|------|------|
| Cherries      | 18 | 0.6  | 10  | 2.22 | 0.02 | 0.02 | 11  | 232 | 12 | 0.4 | 0.23 | 0.21 | 0.1  | 0.07 |
| Grapes        | 3  | 0.25 | 4   | 0.86 | 0.03 | 0.02 | 9   | 127 | 7  | 0.4 | 0.16 | 0.18 | 0.04 | 0.11 |
| Pomegranates  | 5  | 0.3  | 8   | 3.72 | 0.05 | 0.03 | 6   | 231 | 16 | 0.2 | 0.79 | 0.15 | 0.17 | /    |
| Blackcurrants | 9  | 0.3  | 181 | 1.45 | 0.05 | 0.05 | 55  | 322 | 24 | 1.5 | 0.27 | 0.09 | 0.26 | /    |
| Kiwis         | 11 | 0.3  | 62  | 2.43 | 0.05 | 0.02 | 27  | 144 | 12 | 1.2 | 0.57 | 0.87 | 0.73 | 0.28 |
| Strawberries  | 3  | 0.3  | 47  | 0.71 | 0.02 | 0.03 | 18  | 131 | 12 | 1.8 | 0.14 | 0.04 | 0.49 | 0.7  |
| Oranges       | 13 | 0.3  | 33  | 0.56 | 0.05 | 0.04 | 20  | 159 | 14 | 0.4 | 0.14 | 0.03 | 0.05 | 0.31 |
| Kumquats      | 31 | 0.3  | 35  | 1.22 | 0.04 | 0.03 | 56  | 144 | 20 | 1   | 0.21 | 0.07 | 0.25 | 0.62 |
| Lemons        | 3  | 0.6  | 22  | 1.14 | 0.05 | 0.02 | 101 | 209 | 37 | 0.8 | 0.65 | 0.14 | 0.05 | 0.5  |
| Pineapples    | 2  | 0.2  | 18  | 0.1  | 0.04 | 0.02 | 12  | 113 | 8  | 0.6 | 0.14 | 0.07 | 1.04 | 0.24 |
| Bananas       | 5  | 0.7  | 8   | 0.24 | 0.02 | 0.04 | 7   | 256 | 43 | 0.4 | 0.18 | 0.14 | 0.65 | 0.87 |
| Lychees       | 1  | 1.1  | 41  | 0.07 | 0.1  | 0.04 | 2   | 151 | 12 | 0.4 | 0.17 | 0.16 | 0.09 | 0.14 |
| Mangoes       | 75 | 0.3  | 23  | 1.21 | 0.01 | 0.04 | 7   | 153 | 10 | 0.5 | 0.14 | 0.1  | 0.24 | 0.25 |
| Watermelons   | 14 | 0.3  | 5.7 | 0.11 | 0.02 | 0.04 | 7   | 97  | 14 | 0.4 | 0.09 | 0.03 | 0.03 | 0.09 |
| Cantaloupes   | 77 | 0.73 | 12  | 0.05 | 0.04 | 0.01 | 4   | 190 | 19 | /   | 0.13 | 0.01 | 0.01 | 1.1  |

**Table S4.** The vitamin and mineral content of 24 vegetables.

| Vegetables      | Vitamins(mg/100g)        |               |              |                                      |                  |                    | Minerals (mg/100g) |           |           |      |      |        |           |                        |
|-----------------|--------------------------|---------------|--------------|--------------------------------------|------------------|--------------------|--------------------|-----------|-----------|------|------|--------|-----------|------------------------|
|                 | Vitamin<br>( $\mu$ gRAE) | Vitamin<br>B3 | Vitamin<br>C | Vitamin<br>E<br>(mg/ $\alpha$ -TE/d) | Thiamine<br>(B1) | Riboflavin<br>(B2) | Calcium            | Potassium | Magnesium | Iron | Zinc | Copper | Manganese | Selenium<br>( $\mu$ g) |
| White Radish    | 2                        | 0.14          | 19           | 0                                    | 0.02             | 0.01               | 47                 | 167       | 12        | 0.2  | 0.14 | 0.01   | 0.05      | 0.12                   |
| Carrots         | 344                      | 0.6           | 13           | 0.41                                 | 0.04             | 0.03               | 32                 | 190       | 14        | 1    | 0.23 | 0.08   | 0.24      | 0.63                   |
| Chinese Celery  | 2                        | 1.26          | 1            | 0.08                                 | 0.04             | 0.07               | 79                 | 441       | 33        | 0.5  | 0.58 | 0.23   | 0.33      | 1.03                   |
| Peas            | 18                       | 2.3           | 14           | 1.21                                 | 0.43             | 0.09               | 21                 | 332       | 43        | 1.7  | 1.29 | 0.22   | 0.65      | 1.74                   |
| Lentils         | 5                        | 0.24          | 2            | 0.24                                 | 0.05             | 0.06               | 54                 | 163       | 31        | 0.5  | 0.26 | 0.05   | 0.13      | /                      |
| Kidney Beans    | 8                        | 0.26          | 6            | 1.24                                 | 0.02             | 0.05               | 43                 | 196       | 27        | 0.6  | 0.33 | 0.05   | 0.26      | 0.04                   |
| Eggplant        | 4                        | 0.6           | 5            | 1.13                                 | 0.02             | 0.04               | 24                 | 142       | 13        | 0.5  | 0.23 | 0.1    | 0.13      | 0.48                   |
| Tomatoes        | 31                       | 0.49          | 14           | 0.42                                 | 0.02             | 0.01               | 31                 | 197       | 12        | 0.4  | 0.24 | 0.05   | 0.06      | 0.5                    |
| Peppers         | 116                      | 0.8           | 144          | 0.44                                 | 0.03             | 0.06               | 9                  | 278       | 18        | 0.5  | 0.18 | 0.06   | 0.09      | 0.12                   |
| Cucumbers       | 8                        | 0.2           | 9            | 0.49                                 | 0.02             | 0.03               | 24                 | 102       | 15        | 0.5  | 0.18 | 0.05   | 0.06      | 0.38                   |
| Pumpkins        | 74                       | 0.4           | 8            | 0.36                                 | 0.03             | 0.04               | 16                 | 145       | 8         | 0.4  | 0.14 | 0.03   | 0.08      | 0.46                   |
| Chinese Cabbage | 7                        | 0.65          | 37.5         | 0.36                                 | 0.05             | 0.04               | 57                 | 137       | 12        | 0.8  | 0.46 | 0.06   | 0.19      | 0.57                   |
| Wutai-Tai       | 84                       | 1.1           | 45           | 1.16                                 | 0.06             | 0.11               | 186                | 154       | 24        | 3    | 0.7  | 0.13   | 0.36      | 0.5                    |
| Rape            | 122                      | 0.7           | 24           | 0.94                                 | 0.01             | 0.1                | 153                | 157       | 27        | 3.9  | 0.87 | /      | 0.13      | /                      |

|                |     |      |     |      |      |      |     |     |    |     |      |      |      |      |
|----------------|-----|------|-----|------|------|------|-----|-----|----|-----|------|------|------|------|
| Collard Greens | 364 | 1.09 | 63  | 1.12 | 0.07 | 0.18 | 66  | 395 | 53 | 1.6 | 0.56 | 0.06 | 0.4  | /    |
| Broccoli       | 13  | 0.73 | 56  | 0.76 | 0.06 | 0.08 | 50  | 197 | 22 | 0.9 | 0.46 | 0.03 | 0.16 | 0.43 |
| Spinach        | 243 | 0.6  | 32  | 1.74 | 0.04 | 0.11 | 66  | 311 | 58 | 2.9 | 0.85 | 0.97 | 0.1  | 0.66 |
| Celery         | 2   | 0.22 | 4   | 0.2  | 0.01 | 0.03 | 36  | 15  | 15 | 0.2 | 0.1  | 0.02 | 0.06 | 0.1  |
| Lettuce Red    | 2   | 0.52 | 6   | 0.08 | 0.02 | 0.01 | 14  | 91  | 7  | 0.2 | 0.12 | 0.01 | 0.06 | 0.04 |
| Amaranth       | 124 | 0.6  | 30  | 1.54 | 0.03 | 0.1  | 178 | 340 | 38 | 2.9 | 0.7  | 0.07 | 0.35 | 0.09 |
| Mustard Greens | 142 | 0.5  | 72  | 0.64 | 0.02 | 0.11 | 28  | 224 | 18 | 1   | 0.41 | 0.1  | 0.7  | 0.53 |
| Yam            | 3   | 0.3  | 5   | 0.24 | 0.05 | 0.02 | 16  | 213 | 20 | 0.3 | 0.27 | 0.24 | 0.12 | 0.55 |
| Taro           | 1   | 0.28 | 1.5 | 0    | 0.05 | 0.02 | 11  | 25  | 19 | 0.3 | 0.19 | 0.06 | 0.3  | 0.91 |
| Potatoes       | 1   | 1.1  | 14  | 0.34 | 0.1  | 0.02 | 7   | 347 | 24 | 0.4 | 0.3  | 0.09 | 0.1  | 0.47 |

**Table S5.** The Vitamin Index and Mineral Index results in the fruits.

|                | Vitamin Index           |             |          |       | Mineral Index         |             |          |       |
|----------------|-------------------------|-------------|----------|-------|-----------------------|-------------|----------|-------|
|                | Vitamin A Comprehensive |             | Matching |       | Calcium Comprehensive |             | Matching |       |
|                | Index                   | Index       | Index    | Index | Index                 | Index       | Index    | Index |
| Apples         | 0.50                    | 0.03        | 0.55     | 1.08  | 0.25                  | 0.21        | 0.44     | 0.90  |
| Pears          | 0.25                    | 0.03        | 0.57     | 0.85  | 0.5                   | 0.24        | 0.47     | 1.20  |
| Peaches        | 0.25                    | 0.05        | 0.60     | 0.90  | 0.25                  | 0.32        | 0.48     | 1.05  |
| Chinese Dates  | 1.00                    | 1.00        | 0.62     | 2.62  | 1                     | 0.98        | 0.65     | 2.63  |
| Apricots       | 1.00                    | 0.14        | 0.63     | 1.76  | 0.7                   | 0.58        | 0.52     | 1.80  |
| Cherries       | 0.75                    | 0.10        | 0.67     | 1.52  | 0.75                  | 0.58        | 0.54     | 1.87  |
| Grapes         | 0.25                    | 0.03        | 0.58     | 0.86  | 0.4                   | 0.33        | 0.49     | 1.23  |
| Pomegranates   | 0.50                    | 0.05        | 0.66     | 1.22  | 0.25                  | 0.57        | 0.58     | 1.40  |
| Blackcurrants  | 0.75                    | 0.73        | 0.60     | 2.08  | 1                     | 1.00        | 0.58     | 2.58  |
| Kiwis          | 0.75                    | 0.28        | 0.64     | 1.67  | 0                     | 0.47        | 0.62     | 1.09  |
| Strawberries   | 0.25                    | 0.19        | 0.60     | 1.05  | 0.75                  | 0.40        | 0.51     | 1.65  |
| Oranges        | 0.75                    | 0.17        | 0.63     | 1.55  | 0.75                  | 0.47        | 0.50     | 1.71  |
| Kumquats       | 1.00                    | 0.23        | 0.64     | 1.88  | 1                     | 0.61        | 0.54     | 2.15  |
| Lemons         | 0.25                    | 0.10        | 0.68     | 1.03  | 1                     | 0.98        | 0.63     | 2.61  |
| Pineapples     | 0.25                    | 0.08        | 0.61     | 0.93  | 0.75                  | 0.32        | 0.51     | 1.58  |
| Bananas        | 0.50                    | 0.05        | 0.63     | 1.18  | 0.5                   | 0.69        | 0.61     | 1.79  |
| Lychees        | 0.25                    | 0.16        | 0.63     | 1.05  | 0.25                  | 0.37        | 0.51     | 1.13  |
| Mangoes        | 1.00                    | 0.32        | 0.67     | 1.99  | 0.5                   | 0.39        | 0.50     | 1.39  |
| Watermelons    | 0.75                    | 0.07        | 0.58     | 1.40  | 0.5                   | 0.27        | 0.47     | 1.24  |
| Cantaloupes    | 1.00                    | 0.29        | 0.66     | 1.94  | 0.25                  | 0.48        | 0.51     | 1.24  |
| <b>Average</b> |                         | <b>1.43</b> |          |       |                       | <b>1.61</b> |          |       |
